# Supplementary material for: Weightlifting derivatives vs. plyometric exercises: Effects on unloaded and loaded vertical jumps and sprint performance
Source: PLOS journal article supplement (doi:10.1371/journal.pone.0274962), 2022-09-22
Supplement: S2 (10.1371/journal.pone.0274962.s002) [file journal.pone.0274962.s002]

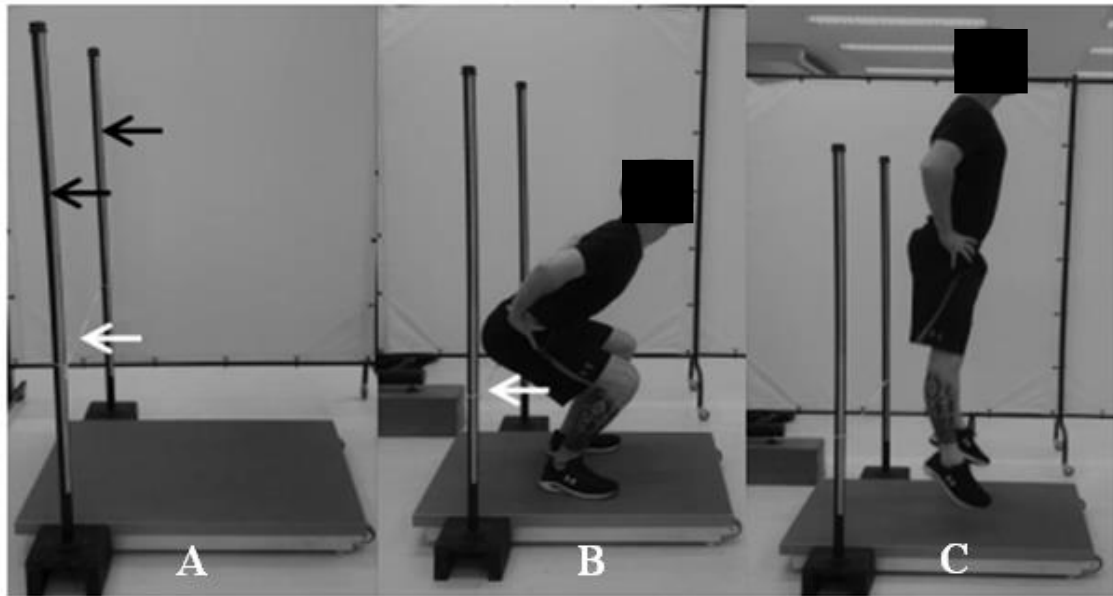

**S2 supplemental material.** (A) Adjustable wooden structures positioned on each side of the force plate (black arrows = measuring tapes, white arrow = elastic band); (B) example of the adjustment for the squat jump. After using a goniometer to determine the 90° knee flexion angle, the range of motion was demarcated by contact of the gluteus with the elastic band; (C) aerial phase of the squat jump.
